# Supplementary material for: IL-33/ST2 Axis Plays a Protective Effect in Streptococcus pyogenes Infection through Strengthening of the Innate Immunity
Source: MDPI journal article supplement (doi:10.3390/ijms221910566), 2021-09-29
Supplement: s1 [file s1]

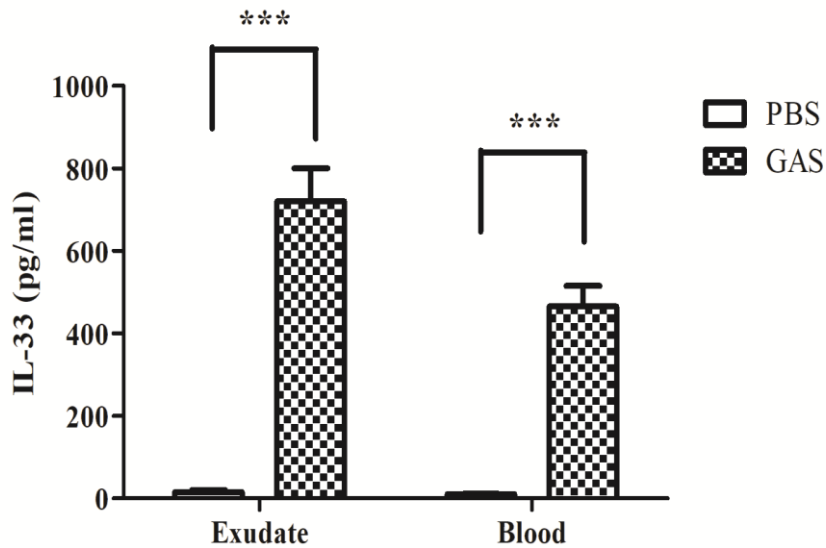

**Figure S1.** The IL-33 expression in GAS-infected B6 mice. Groups of three B6 mice were inoculated via the intra-air pouch route with PBS or  $3 \times 10^8$  *S. pyogenes* NZ131 cells per mouse, as described in Materials and Methods. At 48 h post-infection, mouse exudates and blood were collected, and the concentrations of IL-33 were determined by a capture IL-33 ELISA kit. The concentration of IL-33 was expressed as the mean  $\pm$  standard deviation. \*\*\*  $P < 0.001$  compared with the PBS group.

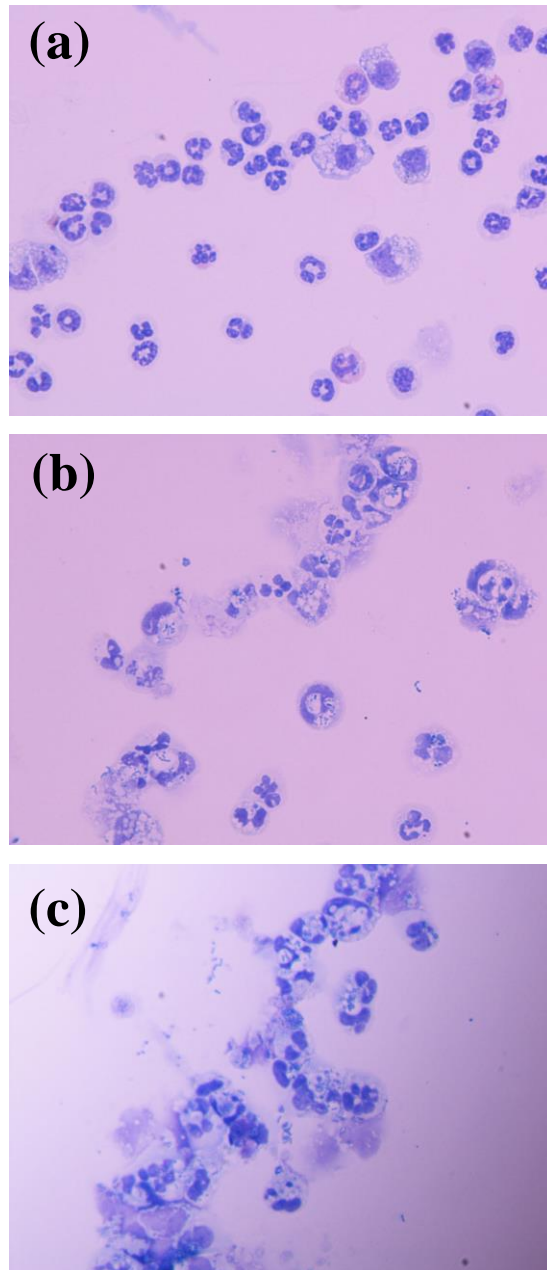

**Figure S2. The morphology of the infiltrating cells in the air pouches.** Groups of four WT, *IL-33*-KO or *ST2*-KO mice were inoculated via the intra-air pouch route with  $2 \times 10^8$  *S. pyogenes* NZ131 cells per mouse. At 24 h post-infection, exudates of the air pouch were collected, and the infiltrating cells were assessed by the cytopsin and Liu stain, and then were observed by microscope. The representative results are shown. a: WT mouse with GAS treatment ( $\times 400$ ); b: *IL-33*-KO mouse with GAS treatment ( $\times 400$ ); c: *ST2*-KO mouse with GAS treatment ( $\times 400$ ).
